# Supplementary material for: A three-stage model pipeline predicting regional avalanche danger in Switzerland (RAvaFcast v1.0.0): a decision-support tool for operational avalanche forecasting
Source: Copernicus journal article supplement (doi:10.5194/gmd-17-7569-2024), 2024-10-30
Supplement: Supplementary file 1 [file gmd-17-7569-2024-supplement.zip]

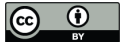

*Supplement of*

## **A three-stage model pipeline predicting regional avalanche danger in Switzerland (RAvaFcast v1.0.0): a decision-support tool for operational avalanche forecasting**

**Alessandro Maissen et al.**

*Correspondence to:* Alessandro Maissen ([alessandro.maissen@sdsc.ethz.ch](mailto:alessandro.maissen@sdsc.ethz.ch))

- [gmd-17-7569-2024-supplement-title-page.pdf](#)
- [video\\_supplement..mp4](#)

The copyright of individual parts of the supplement might differ from the article licence.
